# Supplementary material for: Physiological evidence for diversification of IFNα- and IFNβ-mediated response programs in different autoimmune diseases
Source: Springer Nature journal article supplement (doi:10.1186/s13075-016-0946-9), 2016-02-17
Supplement: MOESM1 [file 9784328]

**Table S1:** List of 23 type I IFN response genes that were measured

| Gene Symbol | Gene Name                                                    |
|-------------|--------------------------------------------------------------|
| EIF2AK2     | eukaryotic translation initiation factor 2-alpha kinase 2    |
| EPSTI1      | epithelial stromal interaction 1                             |
| HERC5       | HECT and RLD domain containing E3 ubiquitin protein ligase 5 |
| IFI27       | interferon, alpha-inducible protein 27                       |
| IFI44L      | interferon-induced protein 44-like                           |
| IFI6        | interferon, alpha-inducible protein 6                        |
| IFIT1       | interferon-induced protein with tetratricopeptide repeats 1  |
| IFIT2       | interferon-induced protein with tetratricopeptide repeats 2  |
| IFITM1      | interferon induced transmembrane protein 1                   |
| IFITM3      | interferon induced transmembrane protein 3                   |
| IL1RN       | interleukin 1 receptor antagonist                            |
| LGALS3BP    | lectin, galactoside-binding, soluble, 3 binding protein      |
| LY6E        | lymphocyte antigen 6 complex, locus E                        |
| MX1         | MX dynamin-like GTPase 1                                     |
| OAS2        | 2'-5'-oligoadenylate synthetase 2, 69/71kDa                  |
| OAS3        | 2'-5'-oligoadenylate synthetase 3, 100kDa                    |
| PARP12      | poly (ADP-ribose) polymerase family, member 12               |
| PLSCR1      | phospholipid scramblase 1                                    |
| RSAD2       | radical S-adenosyl methionine domain containing 2            |
| RTP4        | receptor (chemosensory) transporter protein 4                |
| SAMD9L      | sterile alpha motif domain containing 9-like                 |
| TNFAIP6     | tumor necrosis factor, alpha-induced protein 6               |
| TNFSF10     | tumor necrosis factor (ligand) superfamily, member 10        |

**Table S2:** Genes differentially expressed between SLE and IFN $\beta$ -treated MS patients

| <b>Gene name</b>                                                       | <b>Fold difference</b> | <b>Adjusted P value</b> |
|------------------------------------------------------------------------|------------------------|-------------------------|
| <i>Upregulated in SLE patients (GC-A)</i>                              |                        |                         |
| <b>IFI27</b>                                                           | 7.56                   | <0.001                  |
| <b>IFI44L</b>                                                          | 1.39                   | 0.006                   |
| <b>IFITM1</b>                                                          | 1.69                   | <0.001                  |
| <b>LY6E</b>                                                            | 1.32                   | 0.006                   |
| <b>TNFAIP6</b>                                                         | 1.73                   | 0.003                   |
| <i>Upregulated in IFN<math>\beta</math>-treated MS patients (GC-B)</i> |                        |                         |
| <b>EIF2AK2</b>                                                         | 1.75                   | <0.001                  |
| <b>HERC5</b>                                                           | 4.63                   | <0.001                  |
| <b>IFIT1</b>                                                           | 3.11                   | <0.001                  |
| <b>IFIT2</b>                                                           | 3.86                   | <0.001                  |
| <b>IL1RN</b>                                                           | 3.11                   | <0.001                  |
| <b>LGALS3BP</b>                                                        | 1.68                   | <0.001                  |
| <b>MX1</b>                                                             | 1.14                   | 0.044                   |
| <b>OAS2</b>                                                            | 1.77                   | <0.001                  |
| <b>PARP12</b>                                                          | 1.27                   | 0.009                   |
| <b>PLSCR1</b>                                                          | 1.59                   | <0.001                  |
| <b>RSAD2</b>                                                           | 1.93                   | <0.001                  |
| <b>SAMD9L</b>                                                          | 1.92                   | <0.001                  |
| <b>TNFSF10</b>                                                         | 2.13                   | <0.001                  |
